# Supplementary material
Source: PubMed Central journal article supplement (PMC10164684)
Supplement: NIHMS1871742-supplement-Figure_E6.pdf [file NIHMS1871742-supplement-Figure_E6.pdf]

— Dupilumab — Mepolizumab — Omalizumab

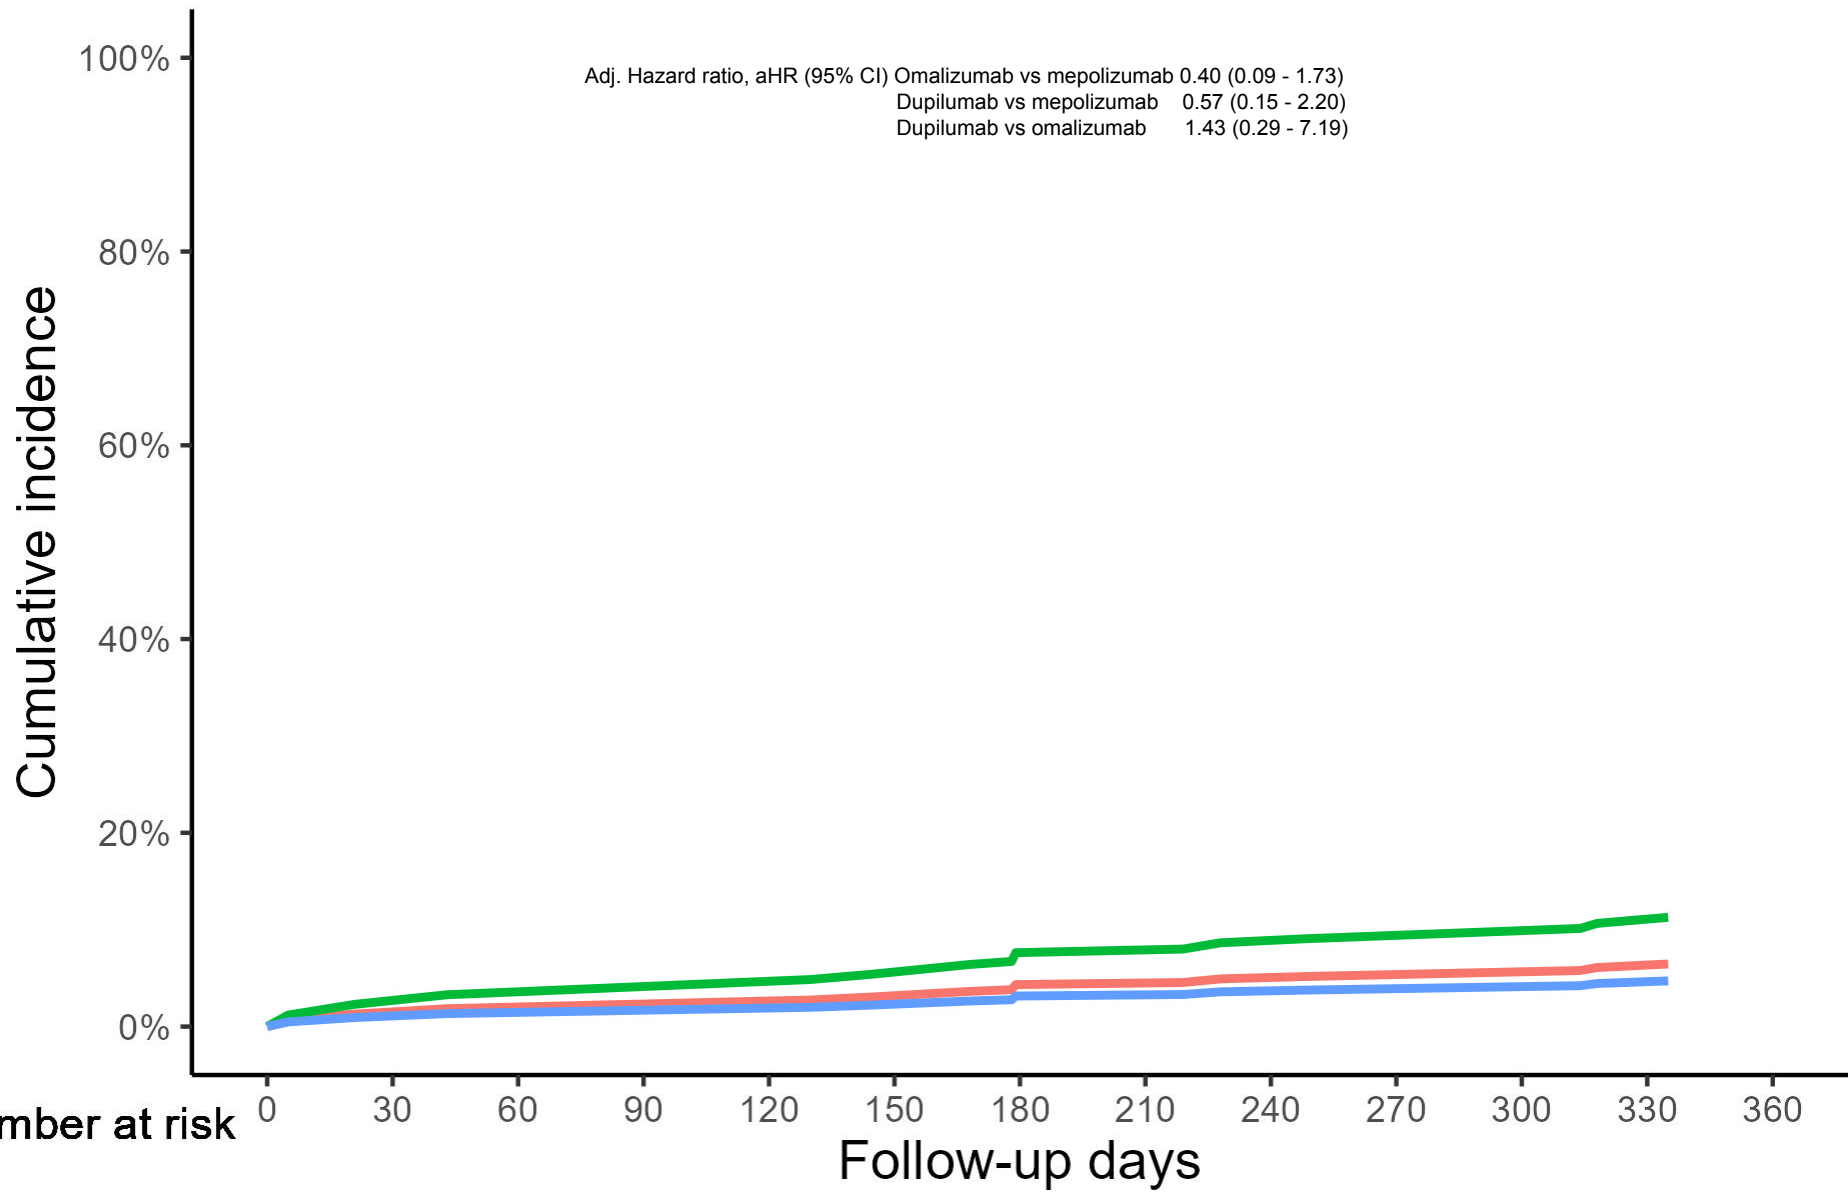

Number at risk 0 30 60 90 120 150 180 210 240 270 300 330 360

Follow-up days

|             |    |    |    |    |    |    |    |    |    |    |    |    |    |
|-------------|----|----|----|----|----|----|----|----|----|----|----|----|----|
| Dupilumab   | 68 | 67 | 67 | 67 | 67 | 67 | 66 | 66 | 65 | 65 | 65 | 64 | 63 |
| Mepolizumab | 65 | 65 | 64 | 64 | 64 | 62 | 60 | 60 | 60 | 59 | 59 | 58 | 58 |
| Omalizumab  | 68 | 67 | 67 | 67 | 67 | 67 | 66 | 66 | 65 | 65 | 65 | 65 | 65 |
