# Supplementary material
Source: PubMed Central journal article supplement (PMC10164684)

COHORT ENTRY  
First prescription of a biologic  
[Day 0]

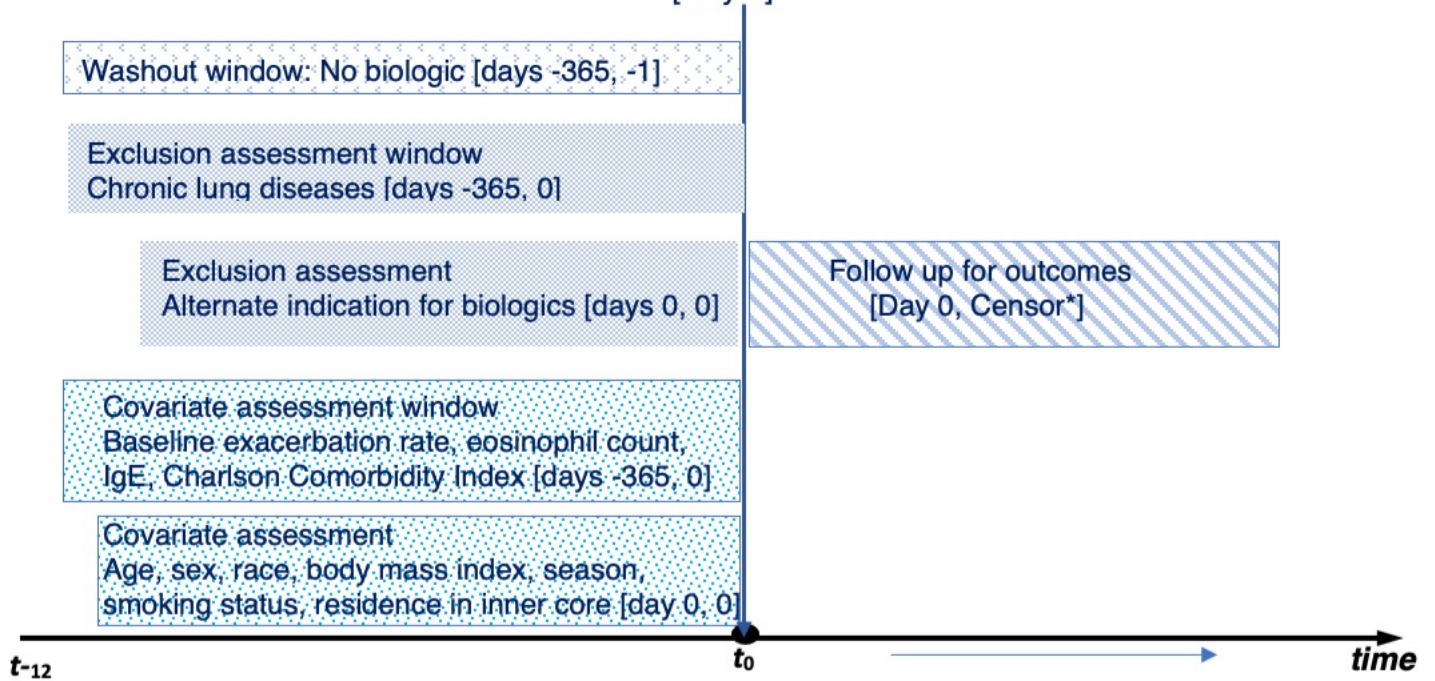

Supplement: NIHMS1871742-supplement-Figure_E1.pdf [file NIHMS1871742-supplement-Figure_E1.pdf]

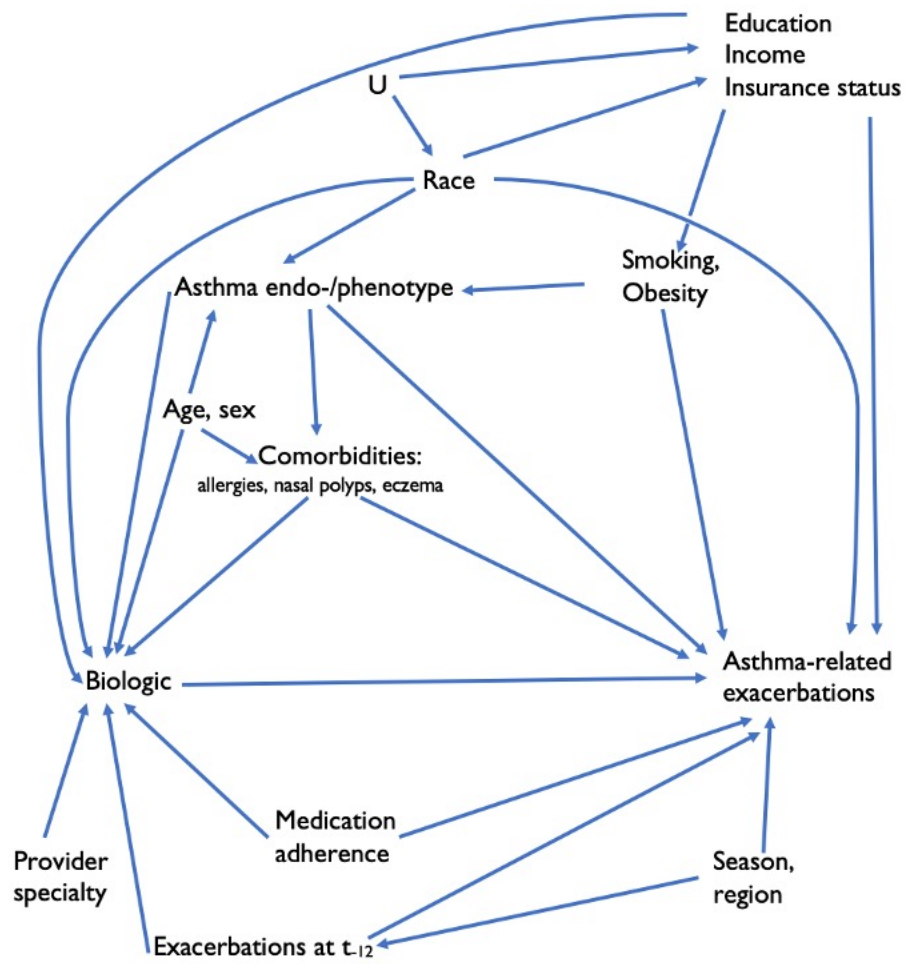

Supplement: NIHMS1871742-supplement-Figure_E2.pdf [file NIHMS1871742-supplement-Figure_E2.pdf]

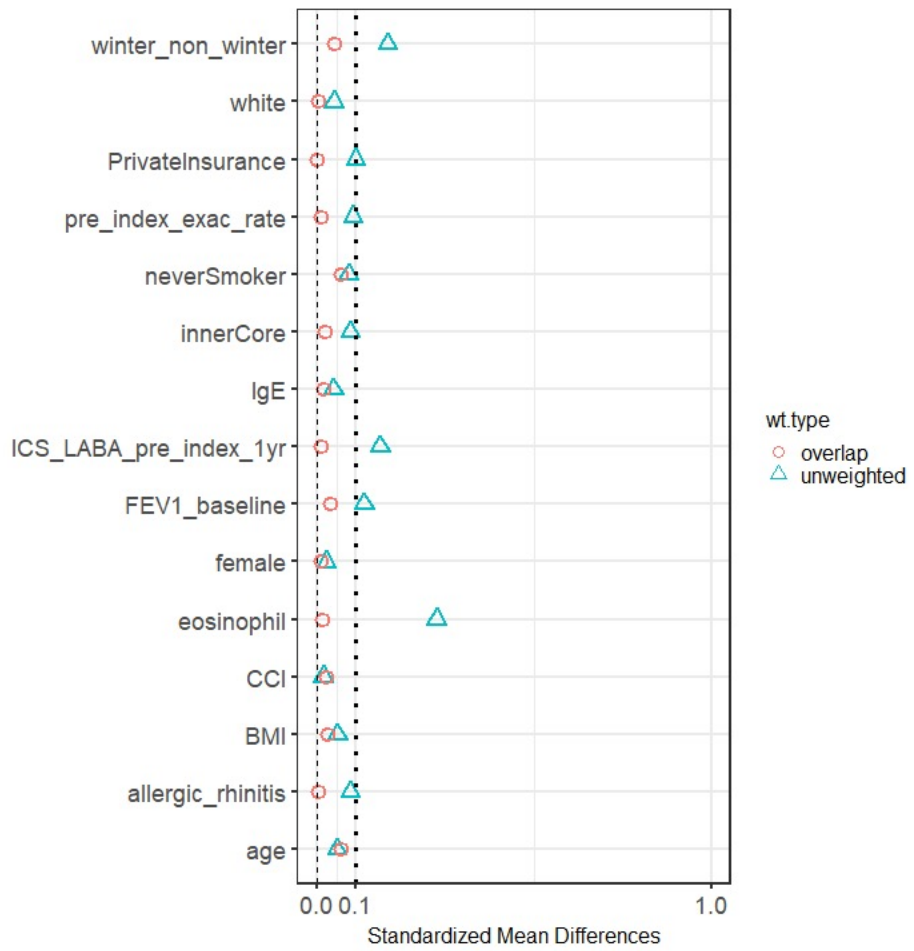

Supplement: NIHMS1871742-supplement-Figure_E3a.pdf [file NIHMS1871742-supplement-Figure_E3a.pdf]

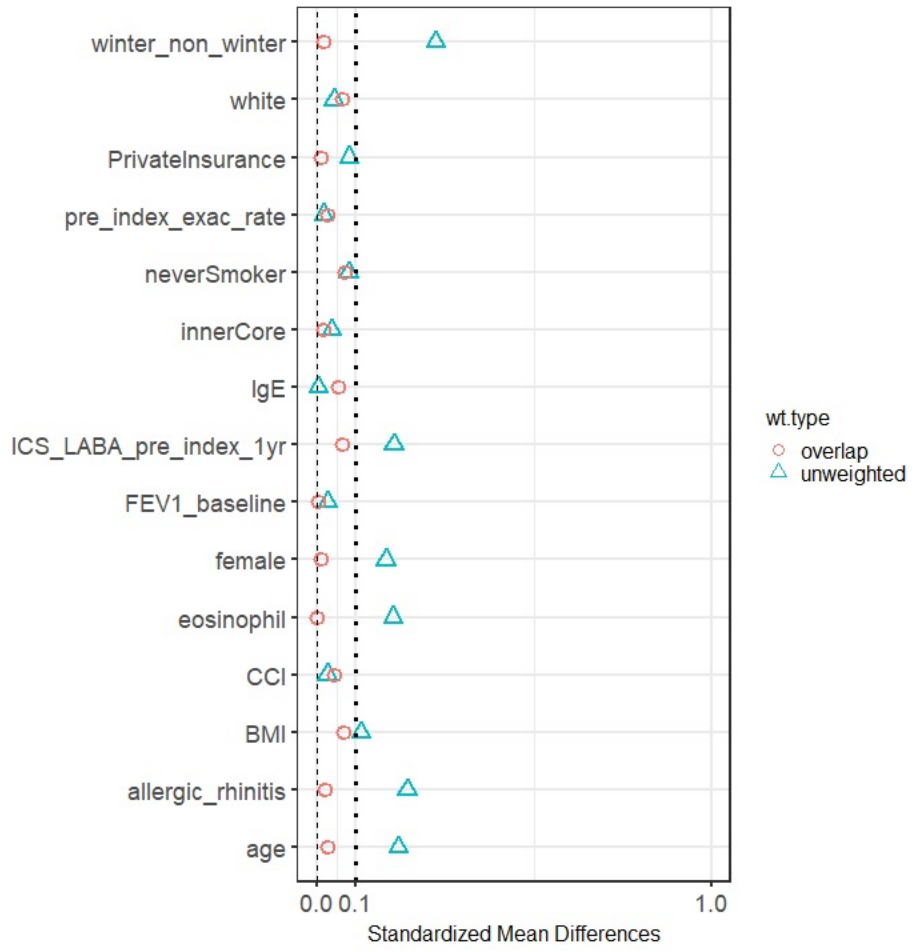

Supplement: NIHMS1871742-supplement-Figure_E3b.pdf [file NIHMS1871742-supplement-Figure_E3b.pdf]

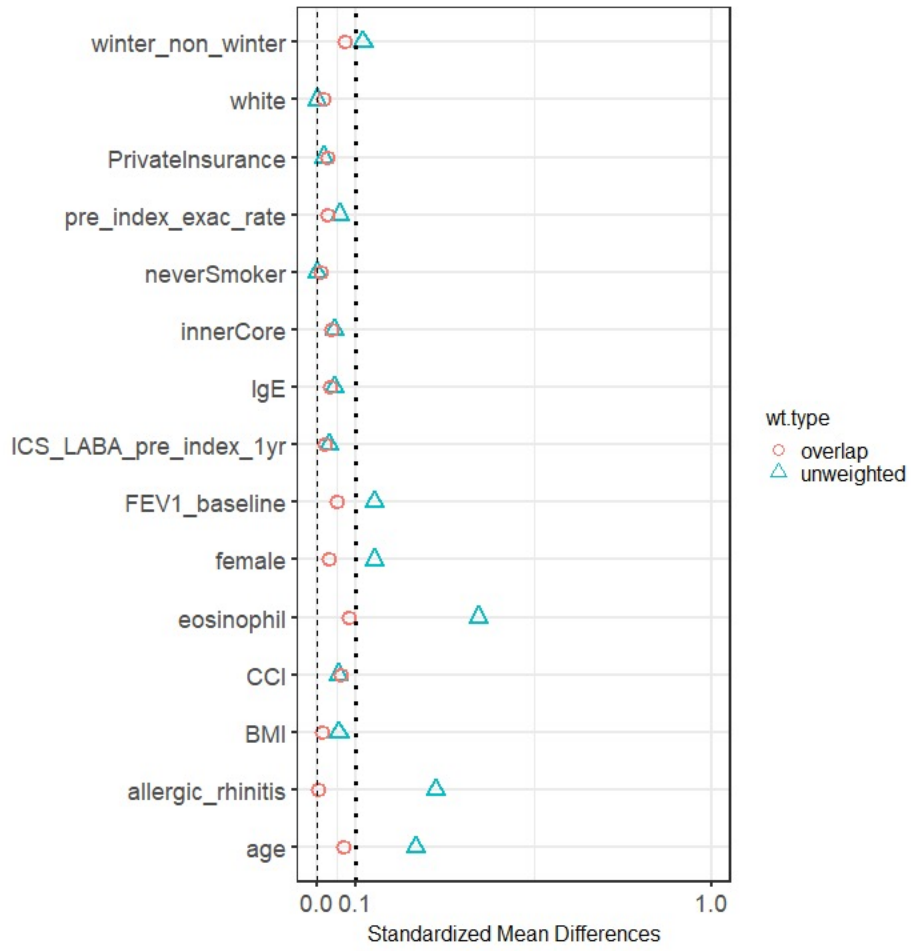

Supplement: NIHMS1871742-supplement-Figure_E3c.pdf [file NIHMS1871742-supplement-Figure_E3c.pdf]

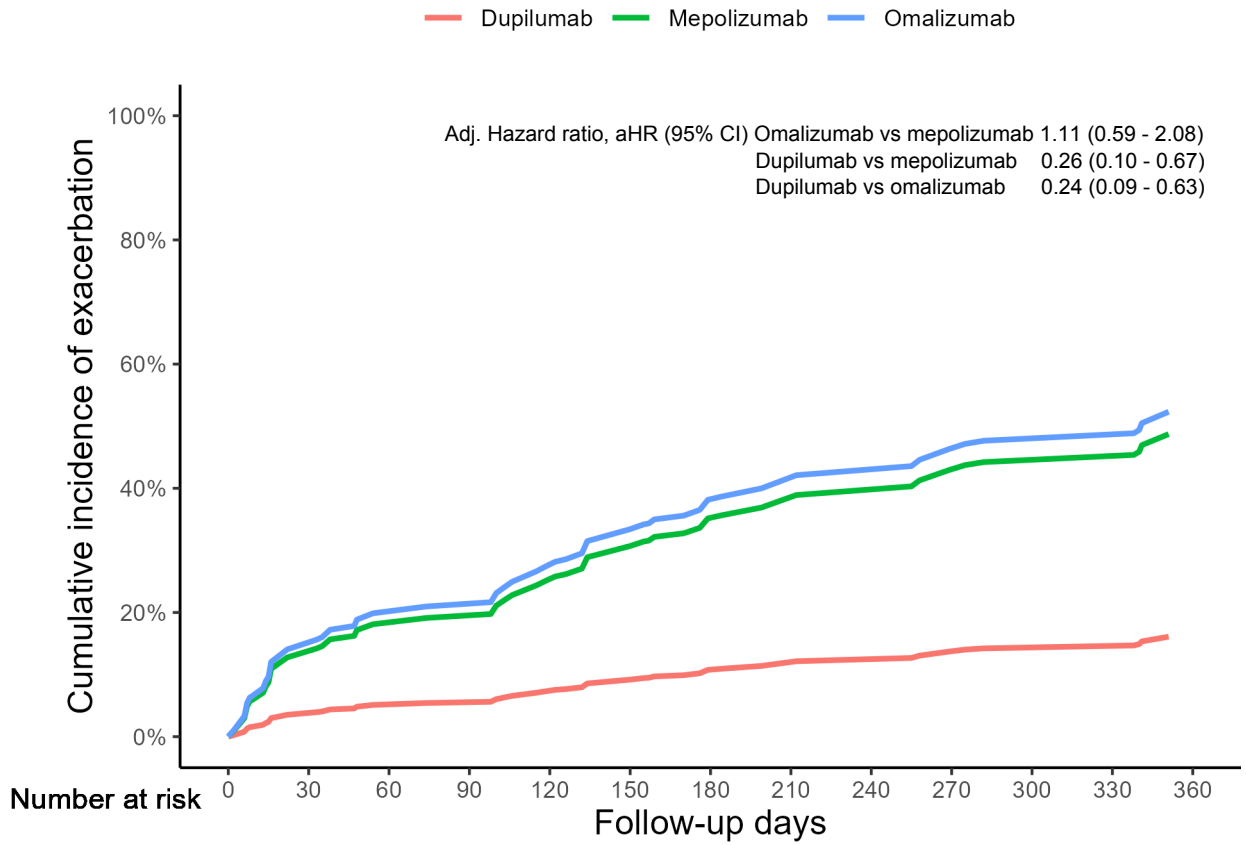

|             |    |    |    |    |    |    |    |    |    |    |    |    |    |
|-------------|----|----|----|----|----|----|----|----|----|----|----|----|----|
| Dupilumab   | 40 | 38 | 37 | 37 | 34 | 33 | 33 | 33 | 33 | 33 | 32 | 32 | 32 |
| Mepolizumab | 52 | 44 | 42 | 41 | 40 | 37 | 34 | 33 | 32 | 30 | 30 | 30 | 27 |
| Omalizumab  | 34 | 30 | 27 | 27 | 23 | 23 | 19 | 18 | 18 | 17 | 16 | 16 | 15 |

Supplement: NIHMS1871742-supplement-Figure_E4.pdf [file NIHMS1871742-supplement-Figure_E4.pdf]

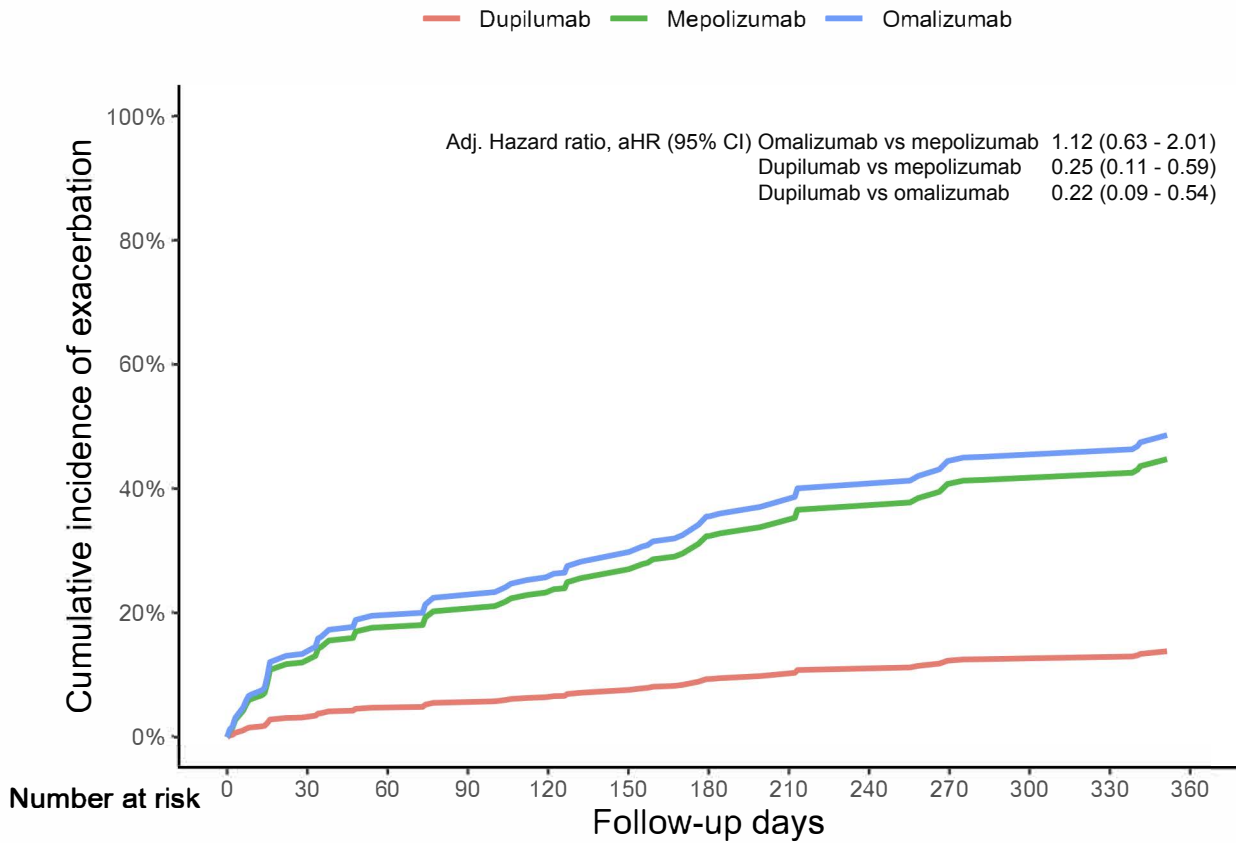

|             |    |    |    |    |    |    |    |    |    |    |    |    |    |
|-------------|----|----|----|----|----|----|----|----|----|----|----|----|----|
| Dupilumab   | 44 | 42 | 41 | 41 | 40 | 39 | 37 | 36 | 36 | 35 | 34 | 34 | 34 |
| Mepolizumab | 59 | 50 | 48 | 46 | 45 | 43 | 40 | 39 | 38 | 36 | 36 | 36 | 33 |
| Omalizumab  | 55 | 48 | 44 | 43 | 39 | 38 | 34 | 33 | 32 | 31 | 30 | 30 | 29 |

Supplement: NIHMS1871742-supplement-Figure_E5.pdf [file NIHMS1871742-supplement-Figure_E5.pdf]
